# Supplementary material
Source: Springer Nature journal article supplement (https://www.springermedizin.de/resource/supplementary/12889_2012_4744_MOESM1_ESM.pdf/9493836)
Supplement: MOESM1 [file 9493836]

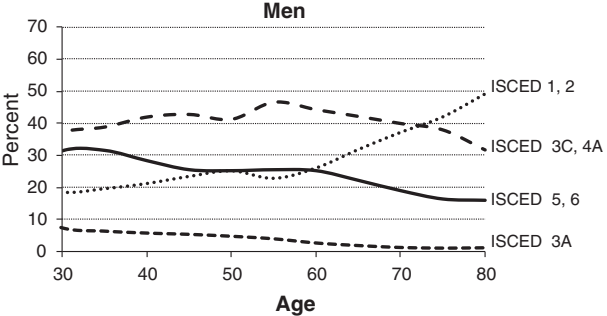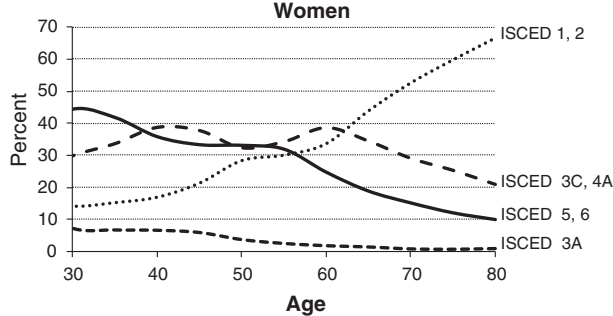

ISCED 1, 2: Primary and lower secondary education. ISCED 3A: Upper secondary education (gymnasium)  
 ISCED 3C, 4A: Upper secondary education (vocational or technical education). ISCED 5, 6: Tertiary education.  
 Less than 3% is missing in the age interval 30-80.
